# Supplementary material
Source: PubMed Central journal article supplement (PMC5875332)
Supplement: jamacardiol-3-326-s001.pdf [file jamacardiol-3-326-s001.pdf]

## Supplementary Online Content

Prakash A, Gordon LB, Kleinman ME, et al. Cardiac abnormalities in patients with Hutchinson-Gilford progeria syndrome. *JAMA Cardiol*. Published online February 21, 2018.  
doi:10.1001/jamacardio.2017.5235

### **eTable.** Lipid Profile and Glucose Metabolism

This supplementary material has been provided by the authors to give readers additional information about their work.

**eTable. Lipid Profile and Glucose Metabolism**

| <b>Parameter</b>          | <b>Median (range)</b> | <b>Fraction (%) abnormal</b>            | <b>Normal Range</b>         |
|---------------------------|-----------------------|-----------------------------------------|-----------------------------|
| Total cholesterol (mg/dL) | 155 (94, 191)         | Borderline 7/27 (26%)<br>High 0/27 (0%) | Desirable <170<br>High >200 |
| LDL cholesterol (mg/dL)   | 97 (40, 133)          | Borderline 6/27 (22%)<br>High 1/27 (4%) | Desirable <110<br>High ≥130 |
| HDL cholesterol (mg/dL)   | 32 (15, 87)           | Low 17/27 (63%)                         | Desirable 36-109            |
| Triglycerides (mg/dL)     | 73 (40, 406)          | Borderline 4/27 (15%)<br>High 2/27 (7%) | Desirable <150<br>High ≥200 |
| Fasting glucose (mg/dL)   | 84 (41, 102)          | 1/27 (4%)                               | Normal <100                 |
| Fasting insulin (μU/mL)   | 5.1 (0.2, 162.4)      | 13/27 (48%)                             | Normal <5                   |
| HOMA-IR                   | 1.1 (0.02, 35.7)      | 9/27 (33%)                              | Normal <2.5                 |

Data are presented as median (range) or frequency (%). HDL indicates high density lipoprotein; HOMA-IR, homeostasis model assessment-insulin resistance
